# Supplementary material
Source: HighWire-hosted journal article supplement (https://erj.ersjournals.com/content/59/2/2101801)
Supplement: inline-supplementary-material-1 [file inline-supplementary-material-1.pdf]

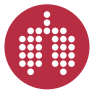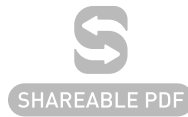

# Evaluation of the PADIS score stratifying risk for venous thromboembolism recurrence after a first unprovoked pulmonary embolism: results from the REVERSE study

Lucia Caiano<sup>1,2</sup>, Rhys Sharkey<sup>1,3</sup>, Marc A. Rodger<sup>4</sup>, Michael J. Kovacs<sup>5</sup>, Grégoire Le Gal<sup>1</sup> and Aurélien Delluc <sup>1</sup>

<sup>1</sup>Dept of Medicine, University of Ottawa, Ottawa Hospital Research Institute, Ottawa, ON, Canada. <sup>2</sup>Dept of Medicine and Surgery, University of Insubria, Varese, Italy. <sup>3</sup>Dept of Medicine, St. Boniface Hospital, Winnipeg, MB, Canada. <sup>4</sup>Dept of Medicine, Faculty of Medicine, McGill University, Montréal, QC, Canada. <sup>5</sup>Division of Hematology, Dept of Medicine, University of Western Ontario, London, ON, Canada.

Corresponding author: Aurélien Delluc ([adelluc@toh.ca](mailto:adelluc@toh.ca))

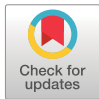

Shareable abstract (@ERSpublications)

**This study does not support that the PADIS-PE score can safely identify patients who could stop anticoagulation after a first unprovoked PE** <https://bit.ly/3GOzeEI>

**Cite this article as:** Caiano L, Sharkey R, Rodger MA, *et al.* Evaluation of the PADIS score stratifying risk for venous thromboembolism recurrence after a first unprovoked pulmonary embolism: results from the REVERSE study. *Eur Respir J* 2022; 59: 2101801 [DOI: 10.1183/13993003.01801-2021].

This single-page version can be shared freely online.

Copyright ©The authors 2022.  
For reproduction rights and  
permissions contact  
[permissions@ersnet.org](mailto:permissions@ersnet.org)

Received: 25 June 2021  
Accepted: 1 Nov 2021

*To the Editor:*

Current guidelines suggest that most patients presenting with a first episode of an unprovoked venous thromboembolism (VTE) event be considered for indefinite anticoagulation, as long as their bleeding risk remains acceptably low [1, 2]. However, this exposes a considerable number of patients to long term anticoagulation as 70% of patients with a first unprovoked VTE will have no recurrence [3]. In 2010, a guidance from the International Society on Thrombosis and Haemostasis (ISTH) suggested that a 1-year cumulative rate of recurrent VTE after stopping anticoagulation of less than 5%, with a 95% confidence interval (CI) upper limit lower than 8%, is low enough to consider that long-term anticoagulant therapy would not be beneficial [4]. As such, efforts are ongoing to identify risk factors and scoring tools to help discriminate between subsets of patients whose risk/benefit ratio most- or least-strongly favours continued therapy.
